# Supplementary material for: Fourteen-membered macrocyclic cobalt complex for the electrolysis of low-concentration gaseous carbon dioxide with high faradaic efficiency toward carbon monoxide
Source: Royal Society of Chemistry journal article supplement (doi:10.1039/d3cy01177a), 2023-11-30
Supplement: d3cy01177a1.pdf [file d3cy01177a1.pdf]

## Supporting Information

### Fourteen-Membered Macrocyclic Cobalt Complex for the Electrolysis of Low-Concentration Gaseous Carbon Dioxide with High Faradic Efficiency Toward Carbon Monoxide

Takeshi Inada,<sup>†</sup> Shoji Iguchi,<sup>†\*</sup> Masahiro Yamamoto,<sup>†</sup> Yusuke Hasegawa,<sup>†</sup> Makoto Moriya,<sup>‡^</sup> Junya Ohyama,<sup>||</sup> Yuta Nabae,<sup>†</sup> Shimpei Naniwa,<sup>†</sup> Tsunehiro Tanaka,<sup>†#</sup> and Kentaro Teramura<sup>†#§\*</sup>

<sup>†</sup>Graduate School of Engineering, Kyoto University

<sup>‡</sup>College of Science, Academic Institute, Shizuoka University

<sup>^</sup>Research Institute of Green Science and Technology, Shizuoka University

<sup>||</sup>Faculty of Advanced Science and Technology, Kumamoto University

<sup>\*</sup>Department of Materials Science and Engineering, Tokyo Institute of Technology

<sup>#</sup>Elements Strategy Initiative for Catalysts and Batteries (ESICB), Kyoto University

<sup>§</sup>Fukui Institute for Fundamental Chemistry (FIFC), Kyoto University.

#### Table of Contents

- Figure S1. Schematic illustration of the electrolysis cell for CO<sub>2</sub> reduction using a GDE cathode.
- Figure S2. Co 2p X-ray photoelectron spectra of (a) Co powder, (b) Co-14MR, and (c) Co(OH)<sub>2</sub>
- Figure S3. SEM image and characteristic X-ray mappings of Co of Co-14MR/KB cathode.
- Figure S4. Time courses of the current density and Faradic efficiency for CO in the potentiostatic electrolysis of CO<sub>2</sub> using Co-14MR/KB and CoTPP/KB.
- Figure S5. TCD-GC/Q-MS profiles for the isotope labelling experiment for CO<sub>2</sub> electrolysis using the Co-14MR cathode.
- Figure S6. Time courses of the cathode potential and Faradic efficiency of CO in the galvanostatic CO<sub>2</sub> electrolysis at 100 mA cm<sup>-2</sup> using Co-14MR and CoPc as cathode catalysts.
- Figure S7. *In-situ* XANES spectra of Co-14MR/KB cathode and photographs of CoPc/KB cathode.
- Figure S8. The formation rate of CO and H<sub>2</sub> in the potentiostatic electrolysis at -1.65 V (Ag/AgCl) under a CO<sub>2</sub> atmosphere (CO<sub>2</sub> electrolysis condition) and an Ar atmosphere (H<sub>2</sub>O electrolysis condition), respectively, using Co-14MR/KB, CoPc/KB, and Co/KB cathodes.
- Table S1. Summary of low concentration CO<sub>2</sub> electrolysis using Co-14MR/KB, CoPc/KB, and Co/KB cathodes.

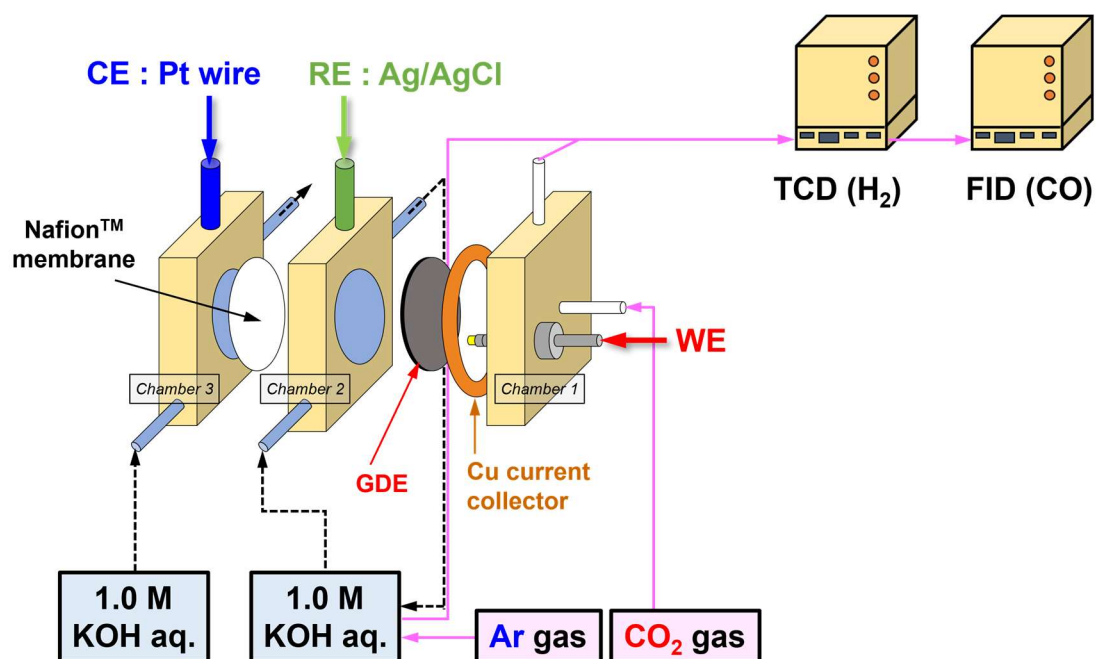

**Figure S1.** Schematic illustration of the electrolysis cell for CO<sub>2</sub> reduction using a GDE cathode. The paths of gas flow are indicated in pink. Gaseous products in the outlet gas were quantified by using on-line gas chromatography. For example, formation rate of CO was calculated by using following equation.

Formation rate of CO / mol s<sup>-1</sup>

$$= \frac{\text{Amount of CO in GC analysis / mol} \times \text{Injected volume of the outlet gas / mL}}{\text{Total flow rate of the outlet gas / mL s}^{-1}}$$

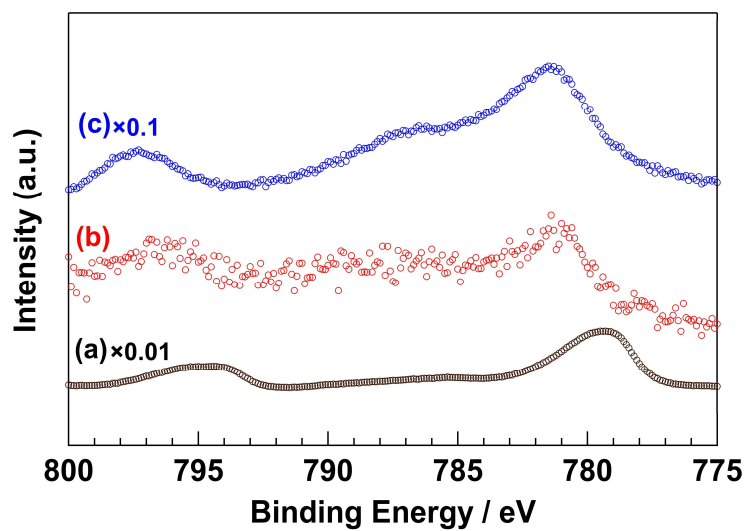

**Figure S2.** Co 2p X-ray photoelectron spectra of (a) Co powder, (b) Co-14MR, and (c) Co(OH)<sub>2</sub> measured by ESCA-3400 (Shimadzu Co. Ltd.) using Mg K $\alpha$  as an X-ray source. Binding energy of spectra were calibrated by Au 4f peak, which was deposited on the samples prior to use.

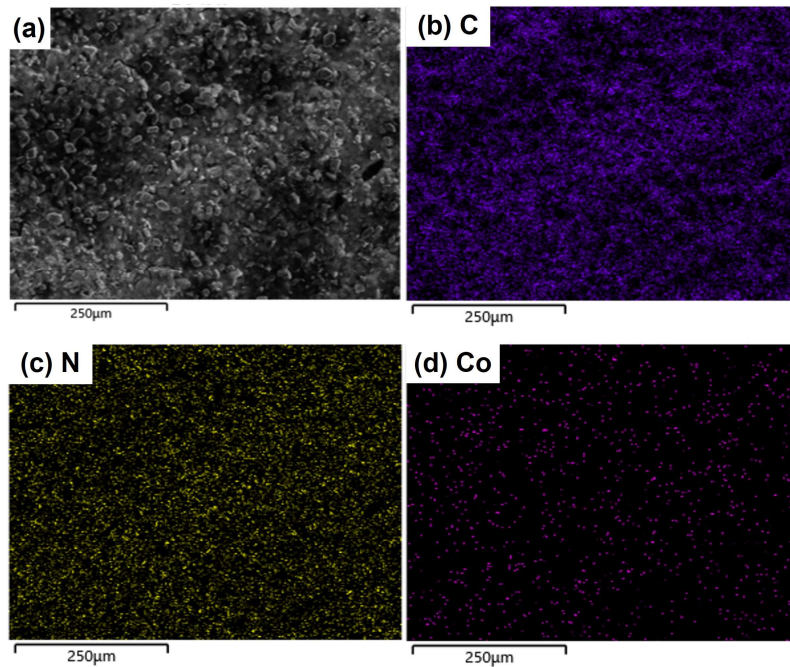

**Figure S3.** (a) SEM image and characteristic X-ray mappings corresponding to (b) C, (c) N, and (d) Co of Co-14MR/KB cathode.

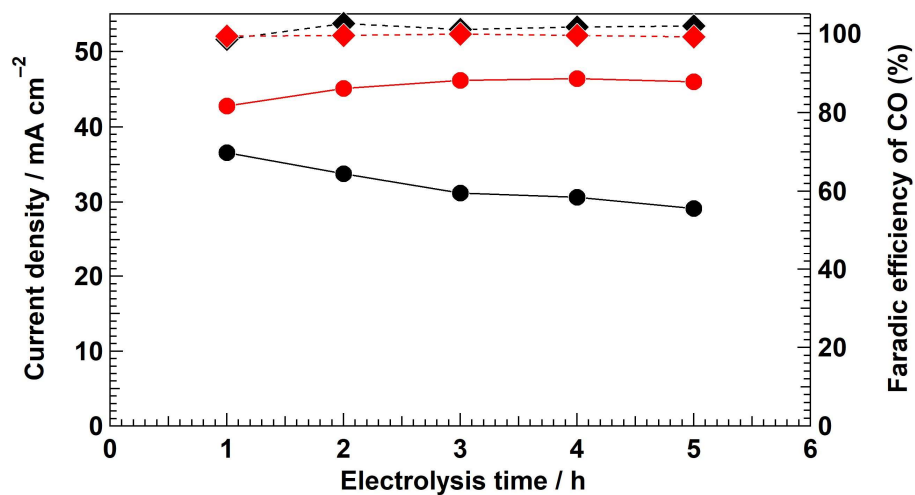

**Figure S4.** Time courses of the current density (circles) and Faradic efficiency for CO (diamonds) in the potentiostatic electrolysis of CO<sub>2</sub> using Co-14MR/KB (red) and CoTPP/KB (black) as cathode catalysts. Cathode potential: -1.65 V (Ag/AgCl, pH = 14); CO<sub>2</sub> supply to chamber 1: 10 mL min<sup>-1</sup>; electrolyte solution of chamber 2 and 3: 1.0 M KOH aq.; electrode area (cathode): 1.9 cm<sup>2</sup>.

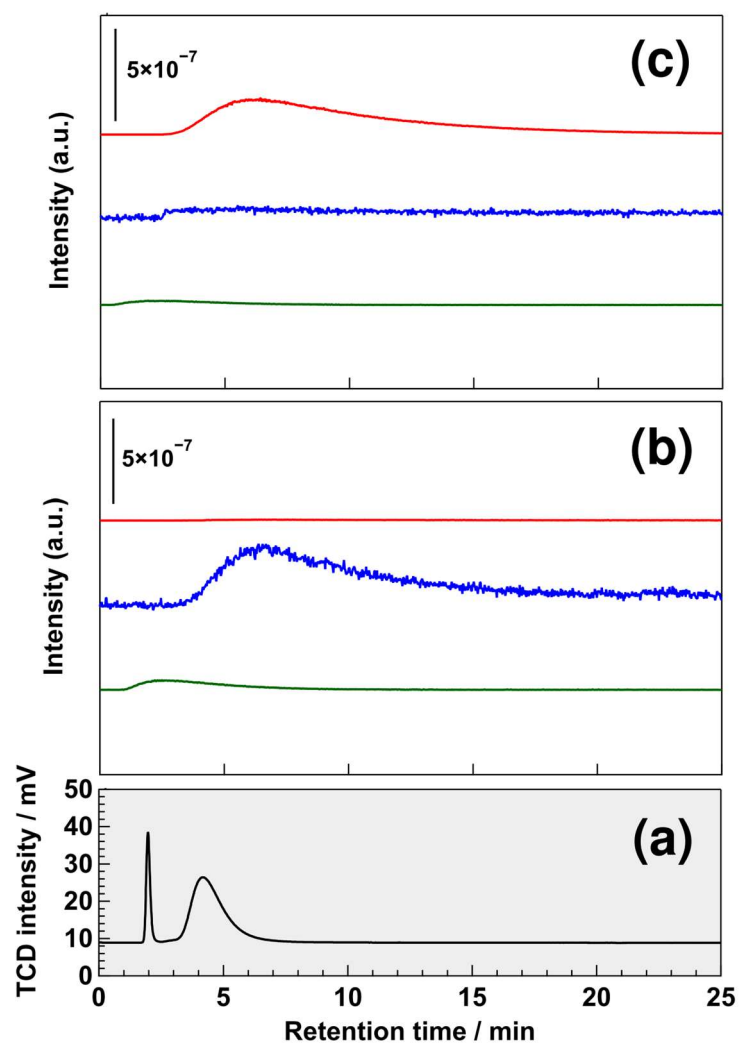

**Figure S5.** TCD-GC/Q-MS profiles for the isotope labelling experiment for CO<sub>2</sub> electrolysis using the Co-14MR cathode. (a) Chromatogram of TCD-GC. (b) and (c) MS profile of  $m/z = 2$  (green), 28 (blue), and 29 (red). (b) and (c) were the results of the electrolysis of standard CO<sub>2</sub> and <sup>13</sup>C-labeled CO<sub>2</sub>, respectively. The peak at 4 min in (a) and broad peaks starting at 4 min in  $m/z = 28$  of (b) and  $m/z = 29$  of (c) corresponded to CO.

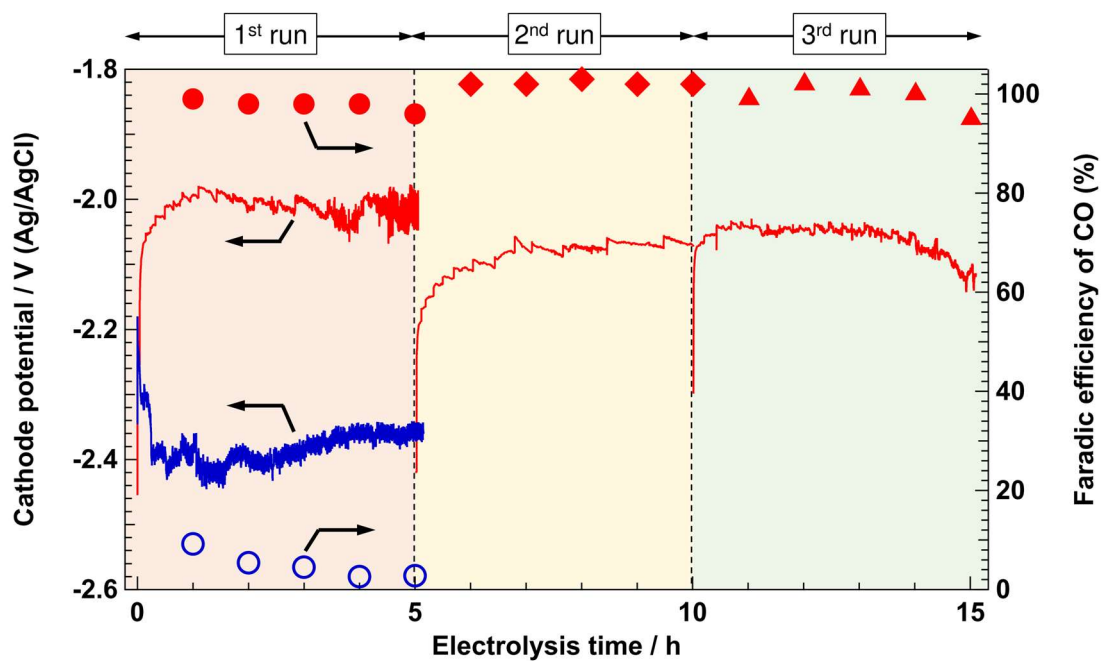

**Figure S6.** Time courses of the cathode potential and Faradic efficiency of CO in the galvanostatic CO<sub>2</sub> electrolysis at 100 mA cm<sup>-2</sup> using Co-14MR (red) and CoPc (blue) as cathode catalysts.

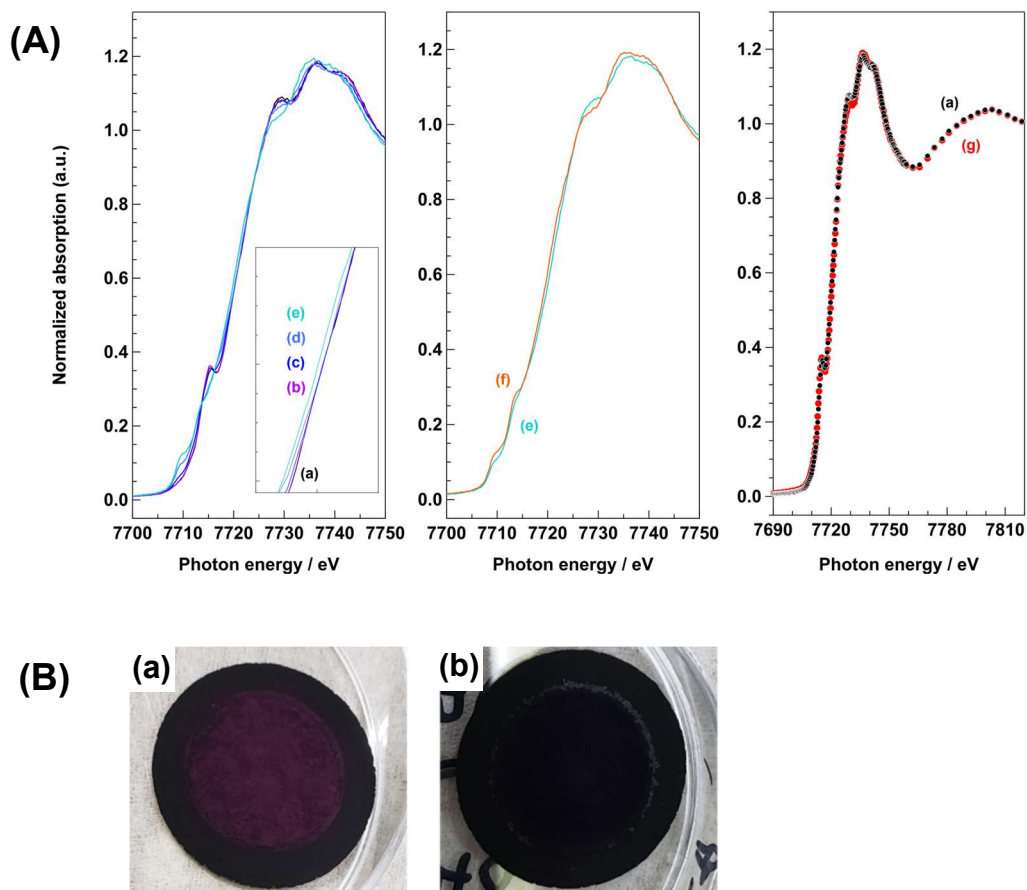

**Figure S7.** (A) *In-situ* XANES spectra of Co-14MR/KB cathode (a) before the electrolysis, during the potentiostatic electrolysis under He atmosphere at (b)  $-0.6$  V (Ag/AgCl), (c)  $-0.9$  V (Ag/AgCl), (d)  $-1.25$  V (Ag/AgCl), (e)  $-1.65$  V (Ag/AgCl), (f) under  $\text{CO}_2$  atmosphere at  $-1.25$  V (Ag/AgCl), and (g) after the electrolysis. (B) Photographs of CoPc/KB cathode (a) before the electrolysis and (b) after the electrolysis.



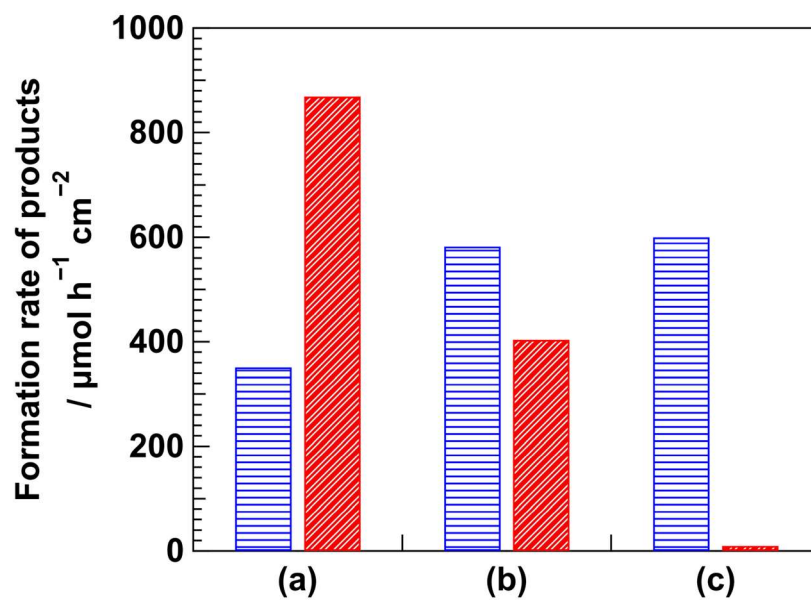

**Figure S8.** The formation rate of CO (red) and H<sub>2</sub> (blue) in the potentiostatic electrolysis at  $-1.65$  V (Ag/AgCl) under a CO<sub>2</sub> atmosphere (CO<sub>2</sub> electrolysis condition) and an Ar atmosphere (H<sub>2</sub>O electrolysis condition), respectively. (a) Co-14MR/KB, (b) CoPc/KB, and (c) Co/KB cathodes.

**Table S1.** Summary of low concentration CO<sub>2</sub> electrolysis using Co-14MR/KB, CoPc/KB, and Co/KB cathodes. Cathode potential: -1.65 V (Ag/AgCl, pH = 14); CO<sub>2</sub>/Ar supply to chamber 1: 10 mL min<sup>-1</sup>; electrolyte solution of chamber 2 and 3: 1.0 M KOH aq.; electrode area (cathode): 1.9 cm<sup>2</sup>.  $I_d$ : current density,  $FE_{CO}$ : Faradic efficiency of CO.

| CO <sub>2</sub> concentration |                           | Cathode catalyst |         |       |
|-------------------------------|---------------------------|------------------|---------|-------|
|                               |                           | Co-14MR/KB       | CoPc/KB | Co/KB |
| 25 % CO <sub>2</sub>          | $I_d / \text{mA cm}^{-2}$ | 34.5             | 23.4    | 23.3  |
|                               | $FE_{CO} (\%)$            | 97               | 76.0    | 0.24  |
| 10 % CO <sub>2</sub>          | $I_d / \text{mA cm}^{-2}$ | 26.7             | 20.4    | 25.0  |
|                               | $FE_{CO} (\%)$            | 95               | 58.5    | 0.04  |
| 5 % CO <sub>2</sub>           | $I_d / \text{mA cm}^{-2}$ | 21.3             | 19.8    | 26.8  |
|                               | $FE_{CO} (\%)$            | 88               | 36.3    | 0.02  |
| 1 % CO <sub>2</sub>           | $I_d / \text{mA cm}^{-2}$ | 12.8             | 25.3    | 33.6  |
|                               | $FE_{CO} (\%)$            | 41               | 3.3     | 0     |
| 0 % CO <sub>2</sub>           | $I_d / \text{mA cm}^{-2}$ | 18.4             | 30.3    | 33.2  |
|                               | $FE_{CO} (\%)$            | 0                | 0       | 0     |
